# Supplementary material for: Early vs. Late Readmission following Percutaneous Coronary Intervention: Predictors and Impact on Long-Term Outcomes
Source: MDPI journal article supplement (doi:10.3390/jcm12041684), 2023-02-20
Supplement: s1 [file s1]

## Supplementary Data

**Table S1.** Clinical Outcomes at 2 and 3 years following Unplanned Readmission within 12 months of PCI after propensity matching

| Outcome n (%)                      | Overall       | No Readmission | Unplanned Readmission | P-value |
|------------------------------------|---------------|----------------|-----------------------|---------|
|                                    | 16,631        | 15,209         | 1,422                 |         |
| <b>2 year Follow-up</b>            |               |                |                       |         |
| <b>Followed up events</b>          | <b>10,997</b> | <b>9,887</b>   | <b>1,110</b>          |         |
| Death                              | 1.6% (179)    | 1.3% (133)     | 4.1% (46)             | <0.001  |
| Myocardial Infarction              | 0.6% (69)     | 0.5% (53)      | 1.4% (16)             | <0.001  |
| TVR                                | 0.5% (54)     | 0.5% (45)      | 0.8% (9)              | 0.11    |
| TLR                                | 0.7% (75)     | 0.6% (60)      | 1.4% (15)             | 0.004   |
| MACE (composite)                   | 2.7% (294)    | 2.3% (225)     | 6.2% (69)             | <0.001  |
| Procedures lead to any readmission | 16.5% (1,815) | 15.5% (1,535)  | 25.2% (280)           | <0.001  |
| Any unplanned readmission          | 6.0% (659)    | 5.4% (533)     | 11.4% (126)           | <0.001  |
| <b>3 year Follow-up</b>            |               |                |                       |         |
| <b>Followed up events</b>          | <b>8,483</b>  | <b>7,608</b>   | <b>875</b>            |         |
| Death                              | 1.6% (133)    | 1.5% (117)     | 1.8% (16)             | 0.51    |
| Myocardial Infarction              | 0.6% (54)     | 0.6% (48)      | 0.7% (6)              | 0.85    |
| TVR                                | 0.4% (32)     | 0.3% (26)      | 0.7% (6)              | 0.12    |
| TLR                                | 0.6% (47)     | 0.6% (45)      | 0.2% (2)              | 0.17    |
| MACE (composite)                   | 2.5% (210)    | 2.4% (183)     | 3.1% (27)             | 0.22    |
| Procedures lead to any readmission | 14.5% (1,226) | 14.0% (1,068)  | 18.1% (158)           | 0.001   |
| Any unplanned readmission          | 5.0% (423)    | 4.7% (357)     | 7.5% (66)             | <0.001  |

TVR-Target vessel revascularization; TLR- Target lesion revascularization; MACE-Major adverse cardiovascular events.
